# Supplementary material for: Prevalence and Associated Factors of Dental Calculus Among Miao and Buyi Ethnic Adults in Huishui County, Guizhou Province, China: A Cross-Sectional Study
Source: Research Square preprint supplement (doi:10.21203/rs.3.rs-7578481/v1), 2025-11-01
Supplement: Supplementary file 1 [file f82fb4a1356b64236114c218.docx]

**Questionnaire on Dental Calculus Severity and Tooth Loss among Adults in Huishui County, Guizhou Province, China**

1. Name [Fill-in-the-blank] *

_________________________________

2. Sex [Single Choice] *

| ○A. Male |
| --- |
| ○B. Female |

3. Ethnic group [Single Choice] *

| ○A. Buyi |
| --- |
| ○B. Miao |
| ○C. Han |
| ○D. Other |

4. Age (years) [Single Choice] *

| ○A. <18 | ○B. 18~25 | ○C. 26~30 | ○D. 31~40 |
| --- | --- | --- | --- |
| ○E. 41~50 | ○F. 51~60 | ○G. 61-70 | ○H. 71-80 |
| ○I. 81-90 | ○J. >90 |  |  |

5. Marital Status [Single Choice] *

| ○A. Single |
| --- |
| ○B. Married |
| ○C. Divorced |

6. Occupation [Single Choice] *

| ○A. Office workers |
| --- |
| ○B. Doctors/Teachers |
| ○C. Administrative cadres |
| ○D. Agricultural workers |
| ○E. Self-employed/Freelancers |
| ○F. Other |

7. Highest Educational Attainment [Single Choice] *

| ○A. No formal education |
| --- |
| ○B. Primary education |
| ○C. Junior secondary education |
| ○D. Senior secondary education |
| ○E. Tertiary education |
| ○F. Postgraduate education |

8. Phone Number [Fill-in-the-blank] *

_________________________________

9. Monthly household income (RMB) [Single Choice] *

| ○A. 0-999 yuan |
| --- |
| ○B. 1,000-2,999 yuan |
| ○C. 3,000-8,000 yuan |
| ○D. >8,000 yuan |

10. Number of people in your household? [Single Choice] *

| ○A. 1 |
| --- |
| ○B. 2-4 |
| ○C. 5-8 |
| ○D. >8 |

11. Fluoride toothpaste use? [Single Choice] *

| ○A. Yes |
| --- |
| ○B. No |
| ○C. Unknown |

12. Daily toothbrushing frequency [Single Choice] *

| ○A. Once daily |
| --- |
| ○B. Twice or more daily |
| ○C. Occasionally |
| ○D. Never |

13. Toothbrushing duration (minutes) [Single Choice] *

| ○A. <1 |
| --- |
| ○B. 1-2.9 |
| ○C. 3-5 |
| ○D. >5 |

14. Which of the following oral hygiene tools have you used? (Select all that apply) [Multiple Choice] *

| □A. Dental floss |
| --- |
| □B. Toothpick |
| □C. Interdental brush |
| □D. Water flosser |
| □E. None of the above |

15. Daily cigarette consumption? [Single Choice] *

| ○A. 1-10 |
| --- |
| ○B. 11-19 |
| ○C. 20-40 |
| ○D. >40 |
| ○E. Never |

16. Smoking duration (years)? [Single Choice] *

| ○A. <1 |
| --- |
| ○B. 1-5 |
| ○C. 6-10 |
| ○D. 11-20 |
| ○E. >20 |
| ○F. Never |

17. Alcohol consumption status [Single Choice] *

| ○A. Daily |
| --- |
| ○B. Weekly |
| ○C. Occasional |
| ○D. Never |
| ○E, Former drinker |

18. Daily sleep duration (hours) [Single Choice] *

| ○A. <4 |
| --- |
| ○B. 4-6.9 |
| ○C. 7-9 |
| ○D. >9 |

19. Weekly outdoor work/exercise days [Single Choice] *

| ○A. Never |
| --- |
| ○B. 1-2 |
| ○C. 3-5 |
| ○D. 5-7 |

20. Daily outdoor work/exercise duration (hours) [Single Choice] *

| ○A. <0.5 |
| --- |
| ○B. 0.5-1.9 |
| ○C. 2-4 |
| ○D. >4 |

21. Daily screen time (hours) [Single Choice] *

| ○A. <2 |
| --- |
| ○B. 2-3.9 |
| ○C. 4-6 |
| ○D. >6 |

22. Tooth loss due to traumatic injury [Single Choice] *

| ○A. None |
| --- |
| ○B. 1-2 teeth |
| ○C. 3-6 teeth |
| ○D. >6 teeth |

23. Presence of congenitally missing teeth [Single Choice]*

| ○A. None |
| --- |
| ○B. 1-2 teeth |
| ○C. 3-6 teeth |
| ○D. >6 teeth |

24. Have you been diagnosed with any of the following conditions? (Select all that apply) [Multiple Choice] *

| □A. Cancer |
| --- |
| □B. Stroke |
| □C. Diabetes |
| □D. Heart disease |
| □E. Hypertension |
| □F. Cognitive impairment |
| □G. Other |
| □F. None |
| □H. Unknown |

25. Weekly frequency of meat consumption [Single Choice] *

| ○A. Never |
| --- |
| ○B. 1-2 days |
| ○C. 3-4 days |
| ○D. 5-7 days |

26. Weekly frequency of nut consumption [Single Choice] *

| ○A. Never |
| --- |
| ○B. 1-2 days |
| ○C. 3-4 days |
| ○D. 5-7 days |

27. Daily intake of dairy products [Single Choice] *

| ○A. 1 carton (250 ml) |
| --- |
| ○B. 2 cartons (500 ml) |
| ○C. ≥3 cartons (750 ml) |
| ○D. Never |

28. Weekly frequency of fruit consumption [Single Choice] *

| ○A. Never |
| --- |
| ○B. 1-2 days |
| ○C. 3-4 days |
| ○D. 5-7 days |

29. Weekly frequency of vegetable consumption [Single Choice] *

| ○A. Never |
| --- |
| ○B. 1-2 days |
| ○C. 3-4 days |
| ○D. 5-7 days |

30. Daily individual intake of vegetables [Single Choice] *

| ○A <150 grams |
| --- |
| ○B 150-295 grams |
| ○C 300-500 grams |
| ○D >500 grams |

31. Types of vegetables consumed (Select all that apply) [Multiple Choice]*

| □A. Fruiting vegetables (e.g., tomato, pepper, eggplant, potato) |
| --- |
| □B. Leafy greens (e.g., bok choy, napa cabbage, spinach, amaranth) |
| □C. Legumes (e.g., string bean, pea, broad bean) |
| □D. Gourds (e.g., chayote, pumpkin, cucumber, bitter melon) |
| □E. Root and stem vegetables (e.g., lettuce, celery, radish, lotus root) |
| □F. Do not consume any vegetables |

32. Primary methods of food preparation (Select all that apply) [Multiple Choice] *

| □A Braising |
| --- |
| □B Frying or Deep-frying |
| □C Steaming |
| □D Boiling or Stewing |

33. Dietary preferences (Select all that apply) [Multiple Choice]*

| □A. Sour |
| --- |
| □B. Spicy |
| □C. Numbing sensation |
| □D. Bland |
| □E. Salty |
| □F. Sweet |

34. Do you regularly consume any of the following foods? (Select all that apply) [Multiple Choice] *

| □A. Sweet snacks and candies (e.g., biscuits, cakes, chocolate, bread) |
| --- |
| □B. Sugar-sweetened beverages (e.g., cola, orange juice, lemonade) |
| □C. Milk, soy milk, or coffee with added sugar |
| □D. None of the above |

35. Frequency of consumption of the aforementioned sugary foods [Single Choice] *

| ○A. 1-2 times per month |
| --- |
| ○B. 1-2 times per week |
| ○C. 3-6 times per week |
| ○D. 1-2 times per day |
| ○E. Never |

36. Do you receive annual regular dental check-ups or professional teeth cleaning? [Single Choice] *

| ○A. No |
| --- |
| ○B. 1-2 times |
| ○C. 3-4 times |
| ○D. >4 times |

37. What was the primary reason for your most recent dental visit? [Single Choice] *

| ○A. Consultation / Examination |
| --- |
| ○B. Preventive care |
| ○C. Treatment |
| ○D. Unknown |

38. What are the reasons for not visiting a dentist in the past year? (Select all that apply) [Multiple Choice] *

| □A. No dental problems |
| --- |
| □B. Lack of time |
| □C. Financial constraints |
| □D. Fear of pain |
| □E. Long waiting times |
| □F. Tolerance of minor dental issues |
| □G. Non-reimbursable dental costs |
| □F. Other |

39. Is it normal for gums to bleed during brushing? [Single Choice] *

| ○A. True |
| --- |
| ○B. False |
| ○C. Unknown |

40. Does consuming sugary foods without subsequent brushing lead to dental caries? [Single Choice] *

| ○A. True |
| --- |
| ○B. False |
| ○C. Unknown |

41. Can oral health potentially affect systemic health? [Single Choice] *

| ○A. True |
| --- |
| ○B. False |
| ○C. Unknown |

42. The health of one's teeth is solely determined by genetics and is independent of personal oral hygiene practices. [Single Choice]*

| ○A. True |
| --- |
| ○B. False |
| ○C. Unknown |

**(The following section to be completed by dental examiner)**

43. Degree of dental calculus [Single Choice] *

| ○A Grade I |
| --- |
| ○B Grade II |
| ○C Grade Ⅲ |
| ○D Clean |

44. Presence of bleeding on probing (BOP) [Single Choice] *

| ○A. Yes |
| --- |
| ○B. No |

45. Presence of deep periodontal pockets (≥ 4mm) [Single Choice] *

| ○A. Yes |
| --- |
| ○B. No |

46. Number of carious teeth (If none, please enter 0) [Fill-in-the-blank] *

_________________________________

47. Tooth numbers of carious lesions (Please use FDI notation, e.g., 11, 26, 46) [Fill-in-the-blank]

_________________________________

48. Number of missing teeth (If none, please enter 0) [Fill-in-the-blank] *

_________________________________

49. Tooth numbers of missing teeth (Please use FDI notation, e.g., 11, 26, 38) [Fill-in-the-blank]

_________________________________

50. Number of retained roots (If none, please enter 0) [Fill-in-the-blank] *

_________________________________

51. Tooth numbers of retained roots (Please use FDI notation, e.g., 11, 26, 38) [Fill-in-the-blank]

_________________________________

52. If teeth are missing, have the edentulous areas been restored? (Select all that apply) [Multiple Choice] *

| □A. Complete denture |
| --- |
| □B. Fixed partial denture |
| □C. Implant-supported prosthesis |
| □D. Removable partial denture |
| □E. Non-standard / Informal prosthesis |
| □F. Missing, not restored |
| □G. Not applicable (No missing teeth) |

53. Presence of the following oral mucosal diseases? (Select all that apply) [Multiple Choice] *

| □A. Oral cancer |
| --- |
| □B. Oral leukoplakia |
| □C. Recurrent aphthous ulcer (RAU) |
| □D. Oral lichen planus |
| □E. Other |
| □F. No abnormalities detected |
